# Supplementary material
Source: PubMed Central journal article supplement (PMC4589897)

Full scans of immunoblots used in figures (I)

Fig. 4b/5a

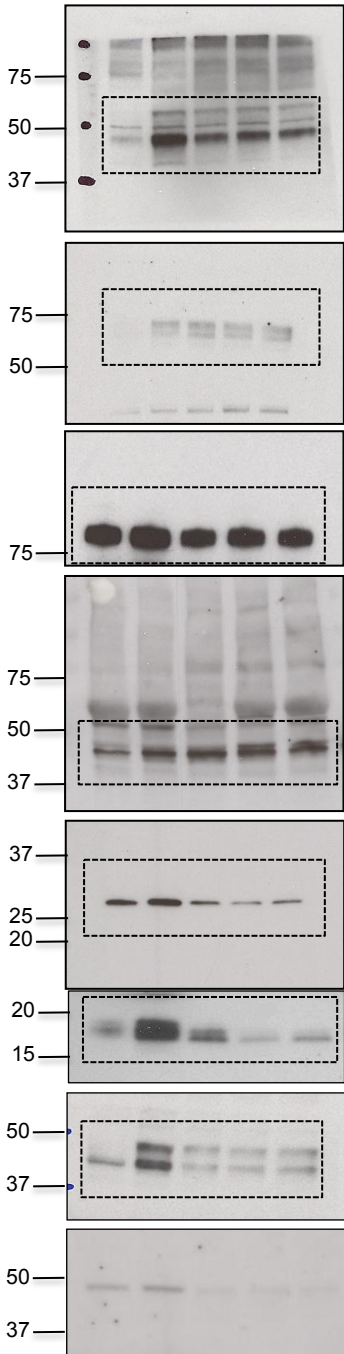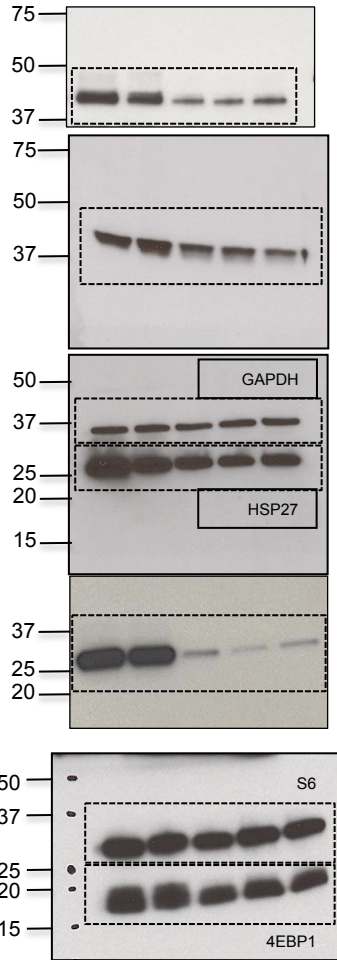

Fig. 4e

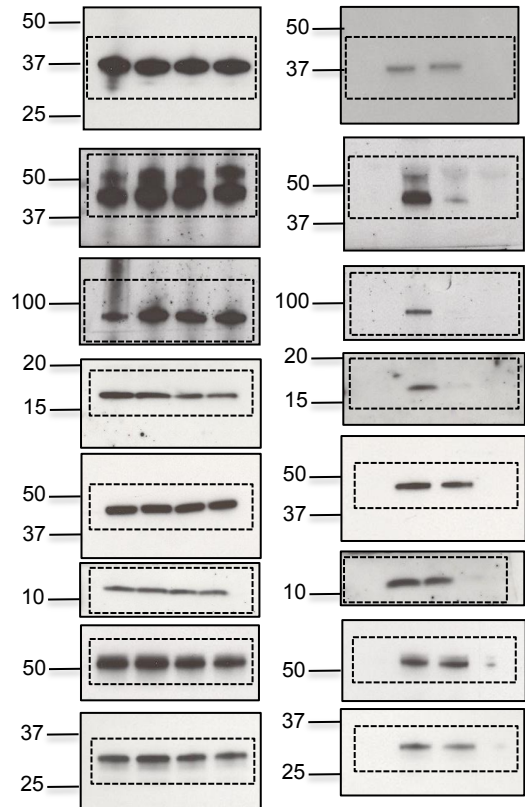

Fig. 4f

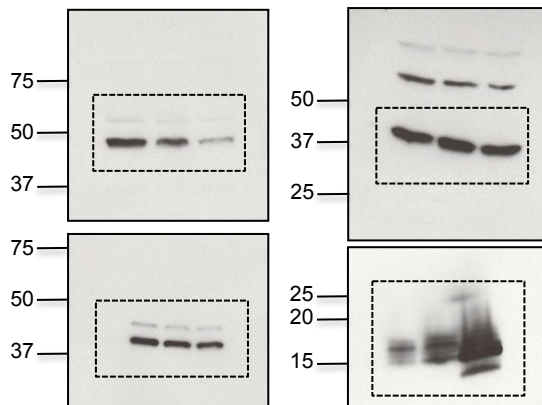

Fig. 5a/S5b

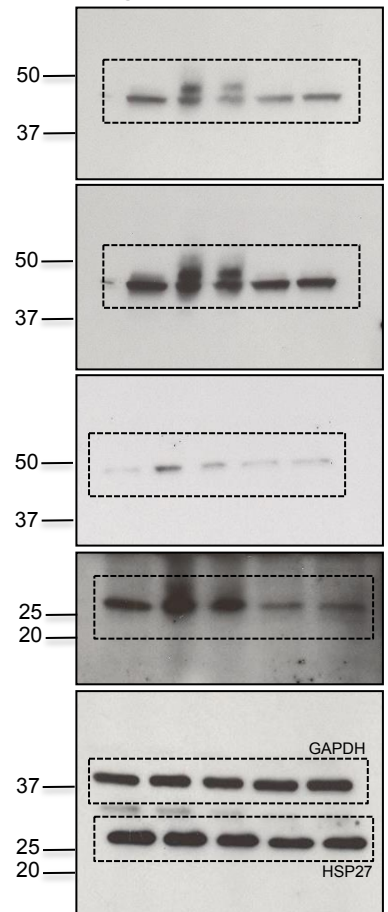

Fig. 5b

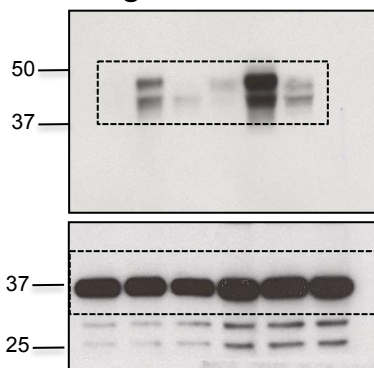

Fig. 5i

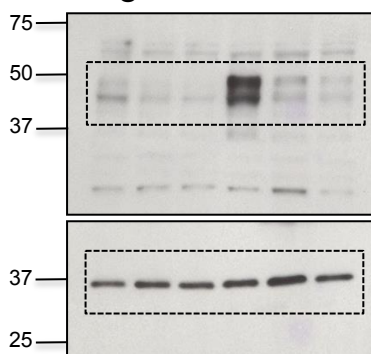

Full scans of immunoblots used in figures (II)

Fig. 6b

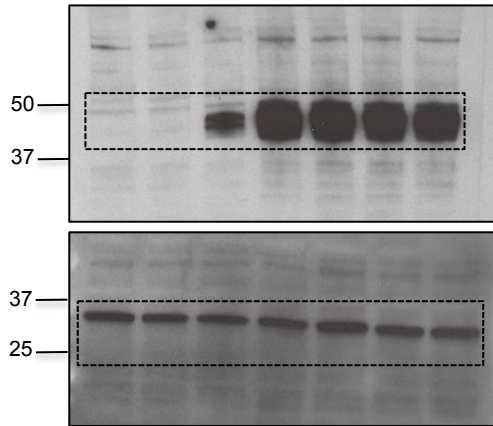

Fig. S2d

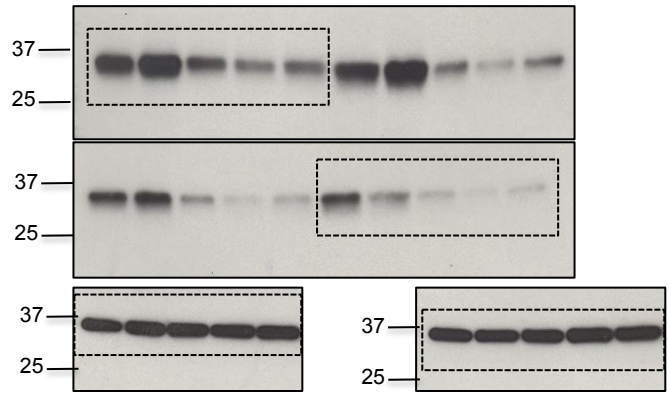

Fig. S2e

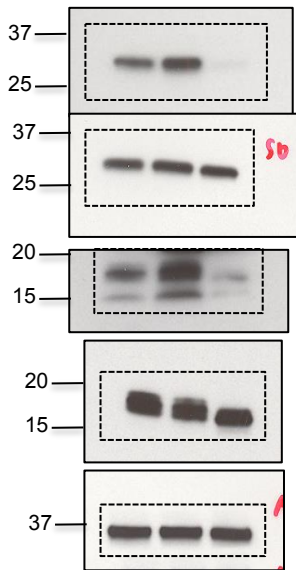

Fig. S4c (IMR90)

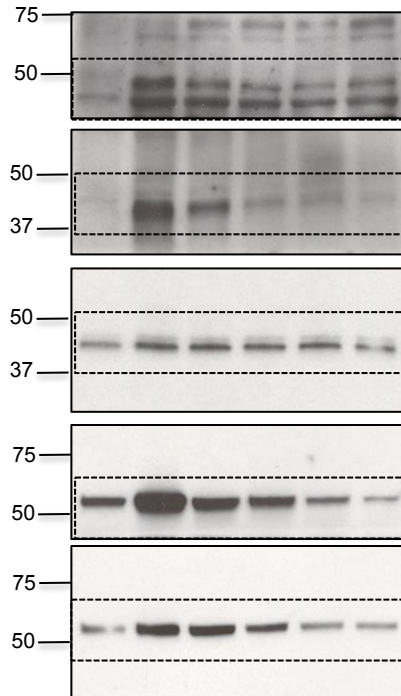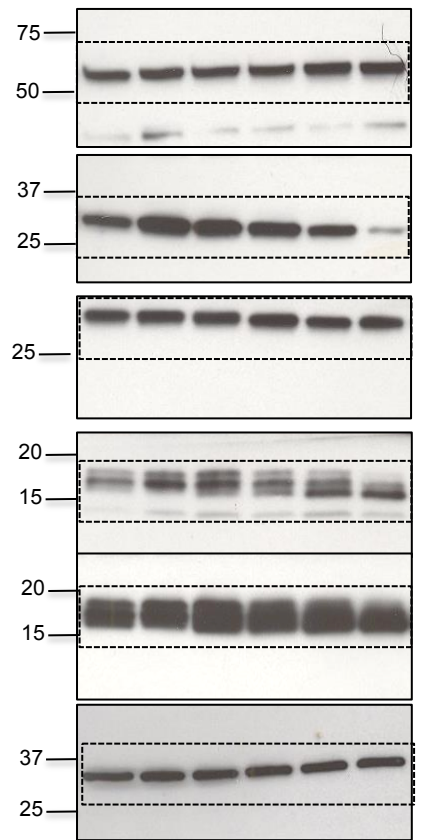

Fig. S4c (BJ)

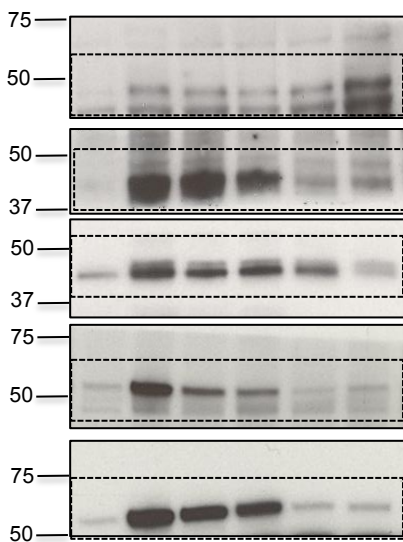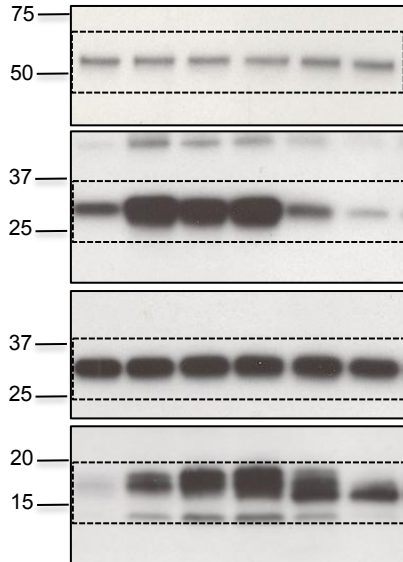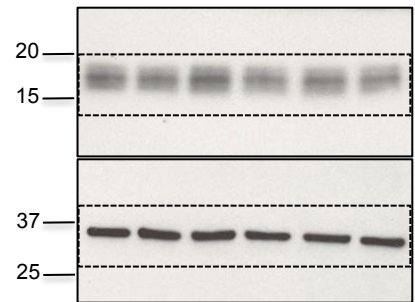

Full scans of immunoblots used in figures (III)

Fig. S4c (HFFF2)

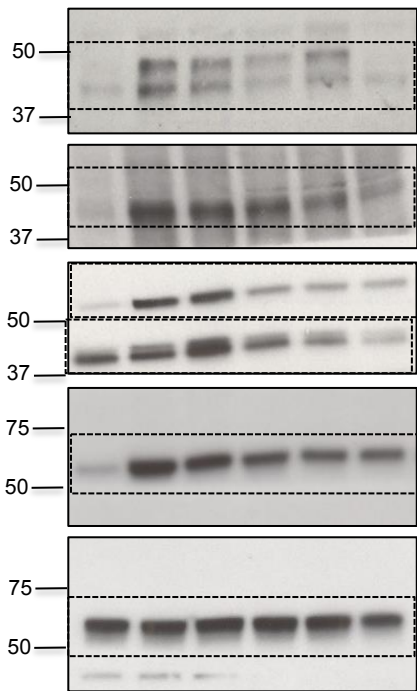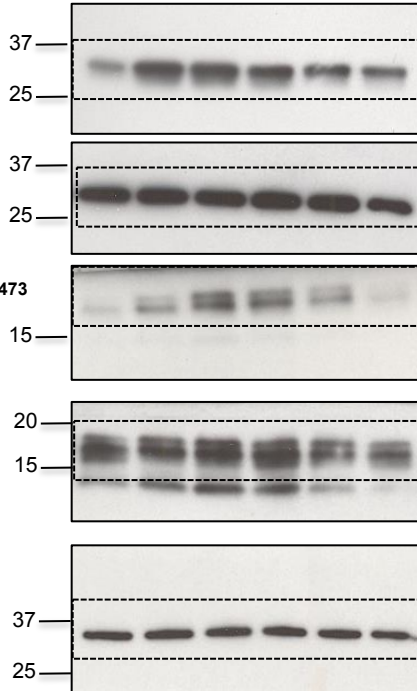

Fig. S4d

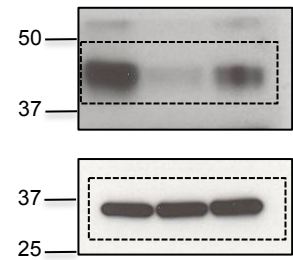

Fig. 6d

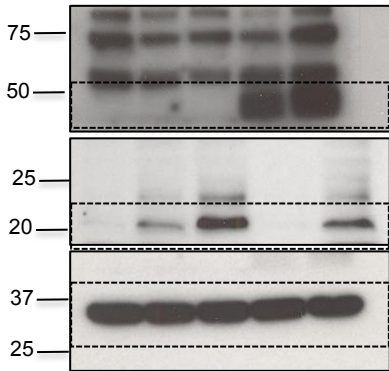

Fig. 8e

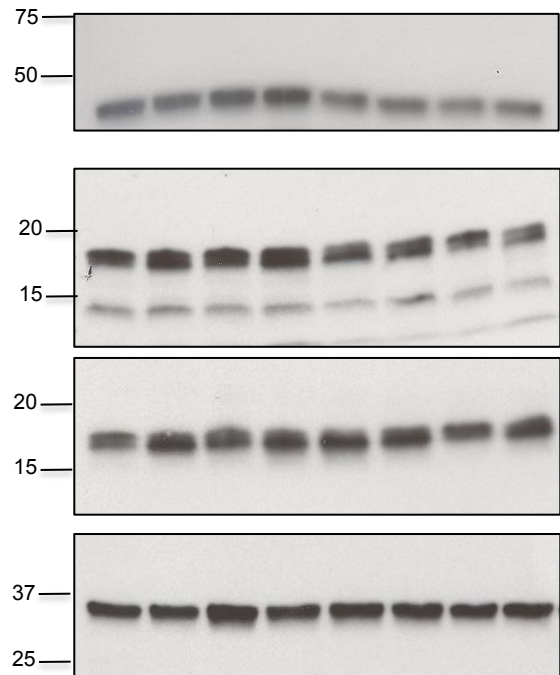

Fig. S6g

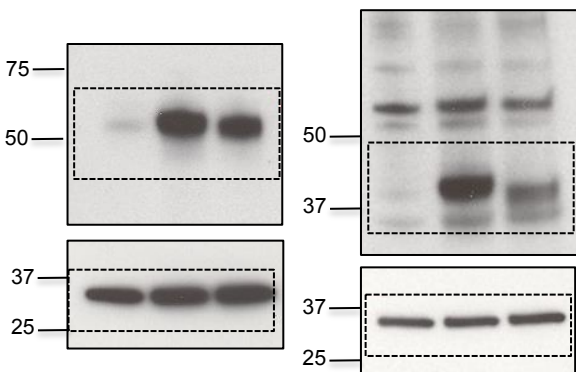

Supplement: NIHMS64332-supplement-SuppFig9.pdf [file NIHMS64332-supplement-SuppFig9.pdf]
