# Supplementary material
Source: PubMed Central journal article supplement (PMC4589897)

**a**

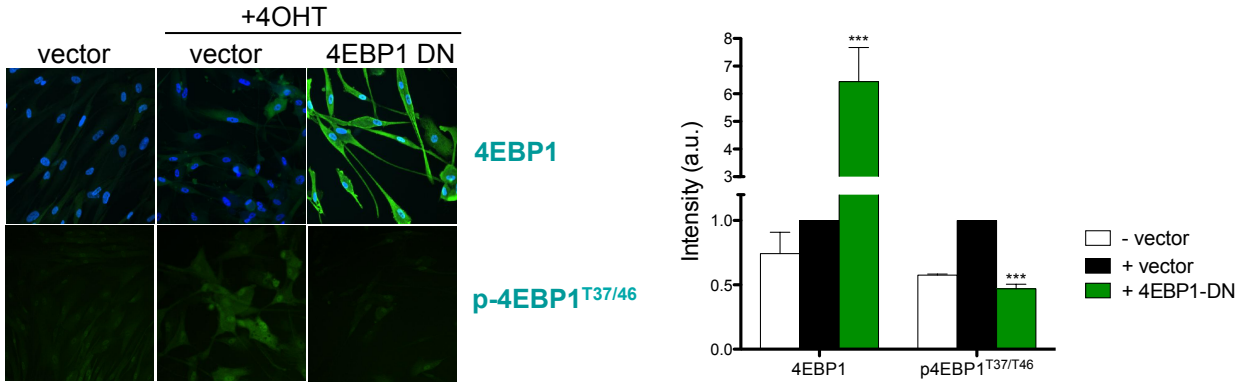

**b**

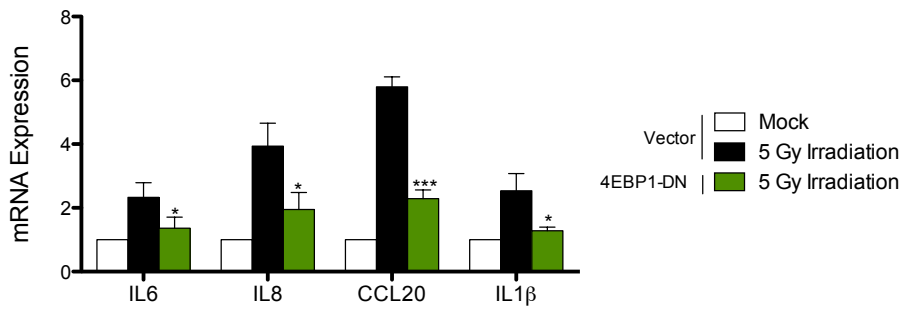

**c**

IMR90 ER:RAS + 4OHT

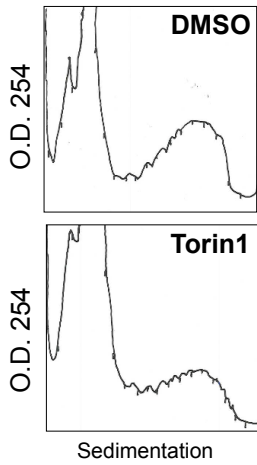

**d**

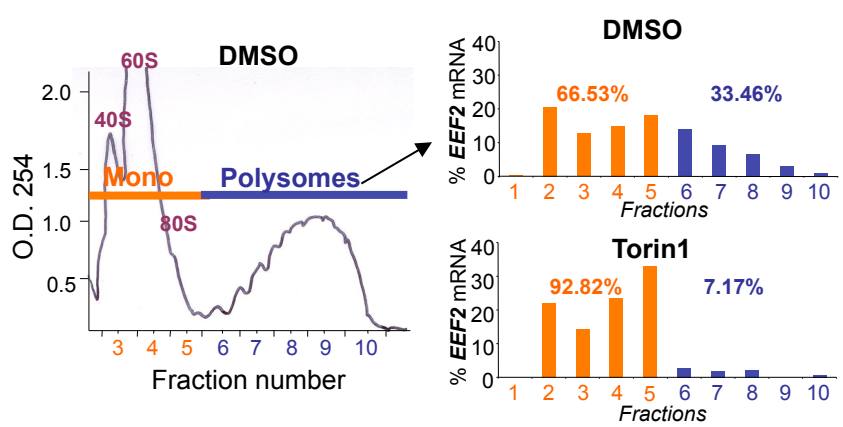

**e**

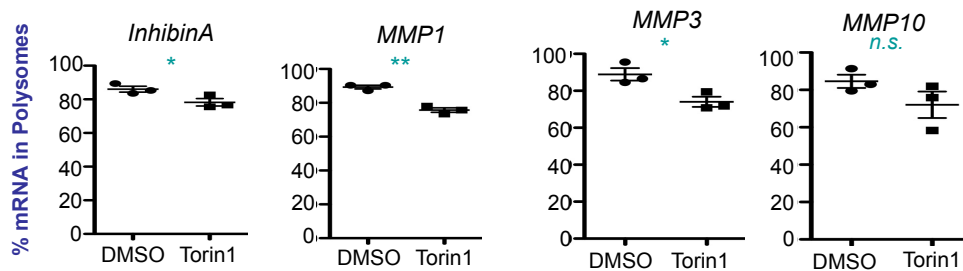

Supplement: NIHMS64332-supplement-SuppFig3.pdf [file NIHMS64332-supplement-SuppFig3.pdf]
