# Supplementary material
Source: PubMed Central journal article supplement (PMC4589897)

**a**

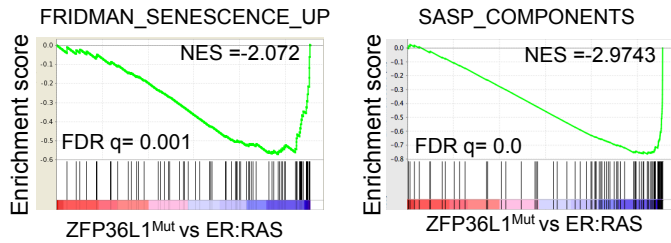

**b**

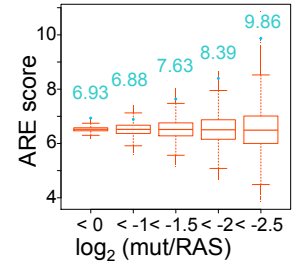

**c**

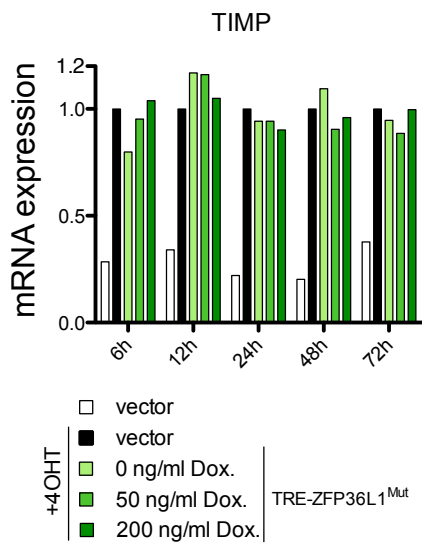

**d**

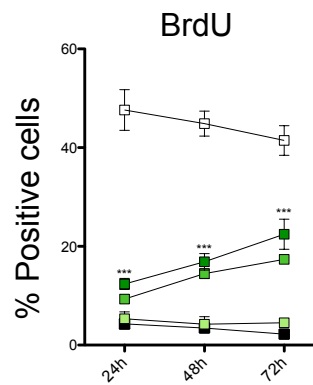

**e**

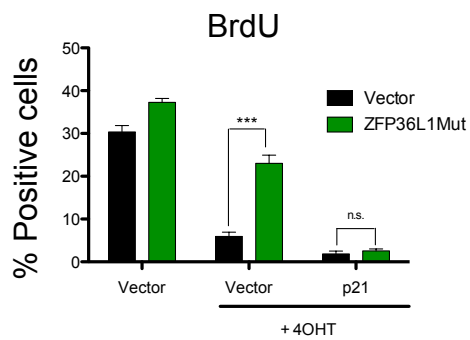

**f**

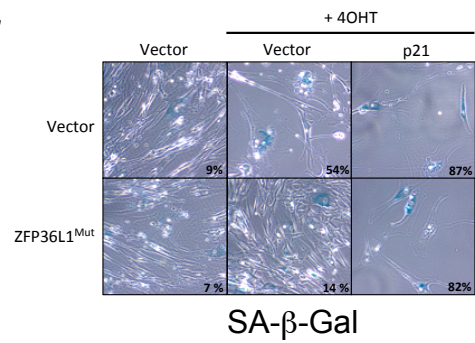

Supplement: NIHMS64332-supplement-SuppFig6.pdf [file NIHMS64332-supplement-SuppFig6.pdf]
