# Supplementary material
Source: PubMed Central journal article supplement (PMC4589897)

**a**

EMT induction

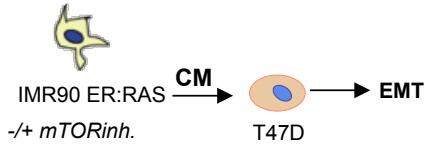

+ 4OHT

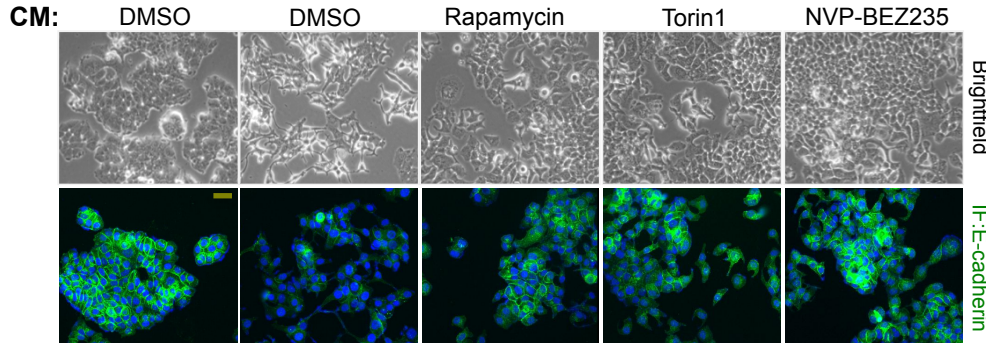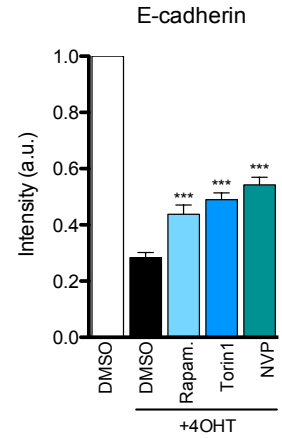

**b**

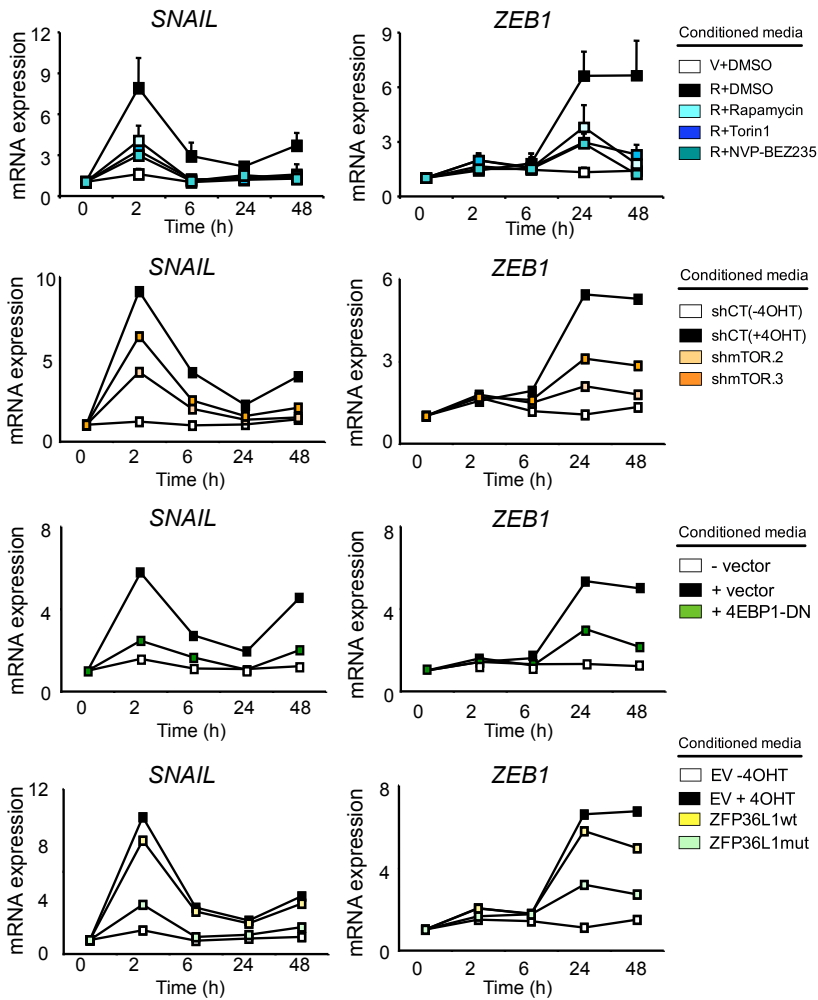

E-cadherin

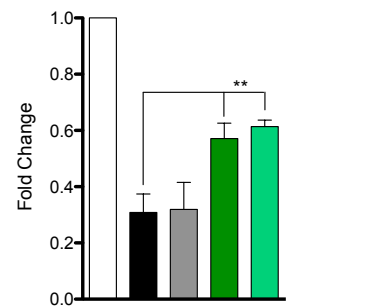

**c**

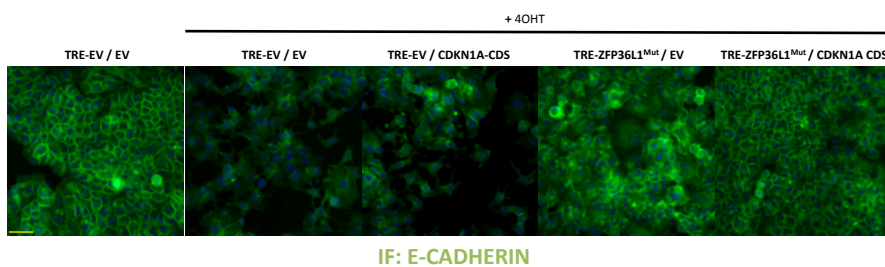

Supplement: NIHMS64332-supplement-SuppFig7.pdf [file NIHMS64332-supplement-SuppFig7.pdf]
