# Supplementary material
Source: PubMed Central journal article supplement (PMC4589897)

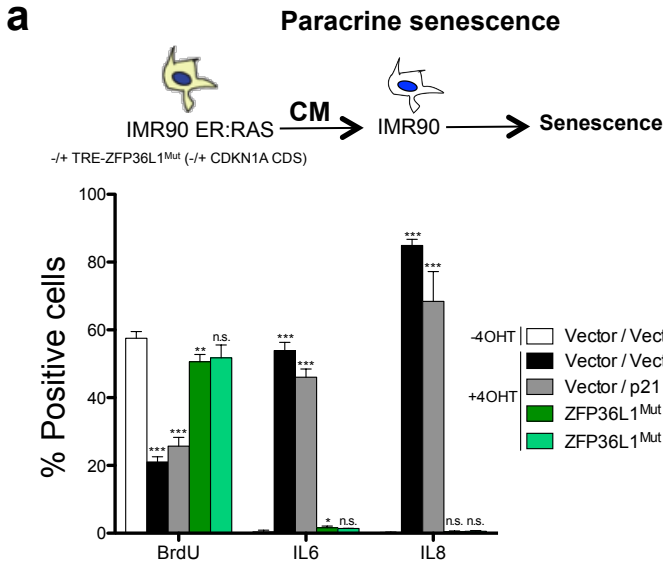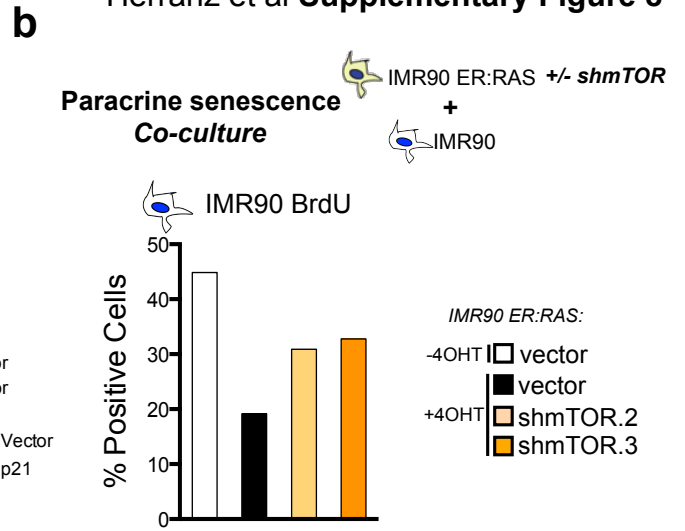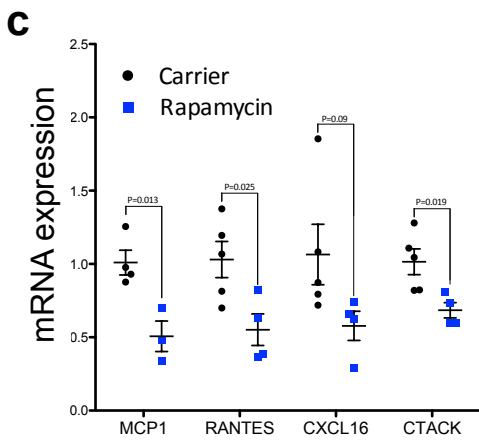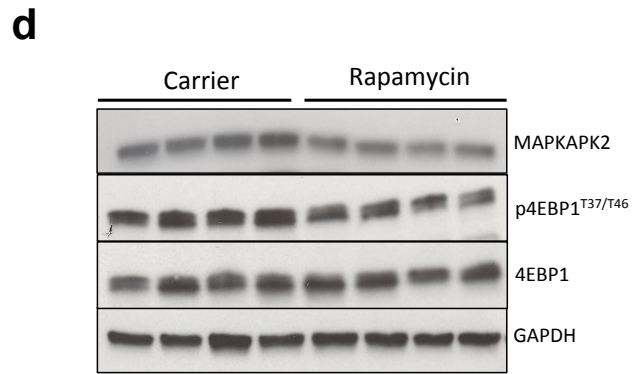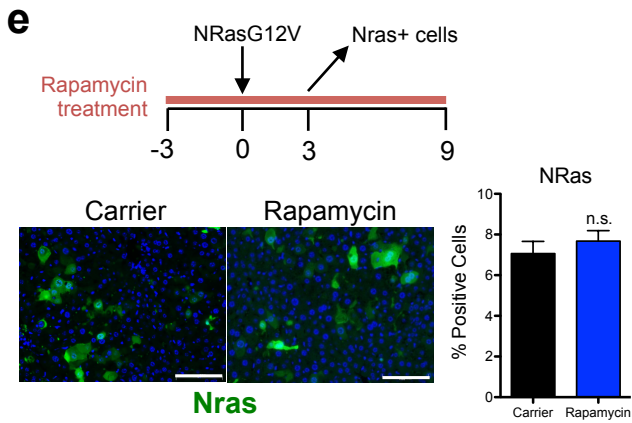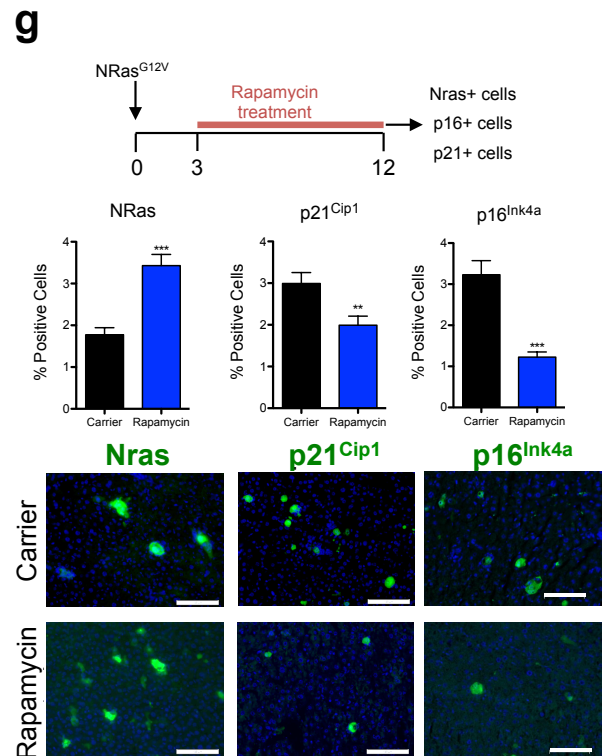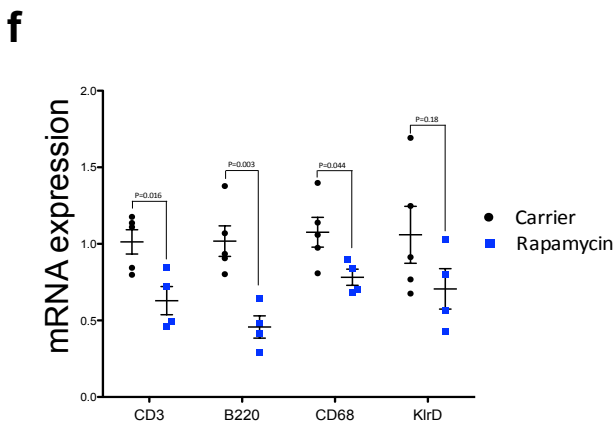

Supplement: NIHMS64332-supplement-SuppFig8.pdf [file NIHMS64332-supplement-SuppFig8.pdf]
